# Supplementary material for: Tailor-Made Detection of Individual Phosphorylated and Non-Phosphorylated EPIYA-Motifs of Helicobacter pylori Oncoprotein CagA
Source: MDPI journal article supplement (doi:10.3390/cancers11081163), 2019-08-13

Supplementary Materials

## Tailor-Made Detection of Individual Phosphorylated and Non-Phosphorylated EPIYA-Motifs of *Helicobacter pylori* Oncoprotein CagA

Suneesh Kumar Pachathundikandi, Andrés Julián Gutiérrez-Escobar and Nicole Tegtmeyer

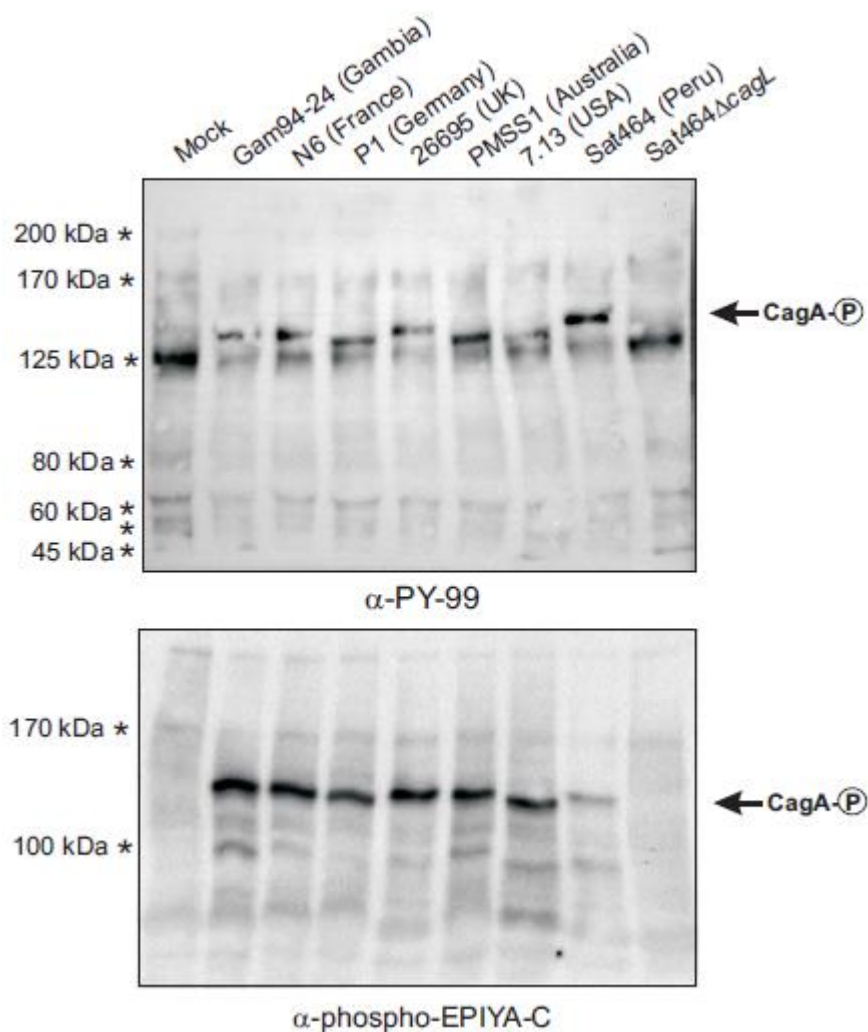

Figure S1. Cont.

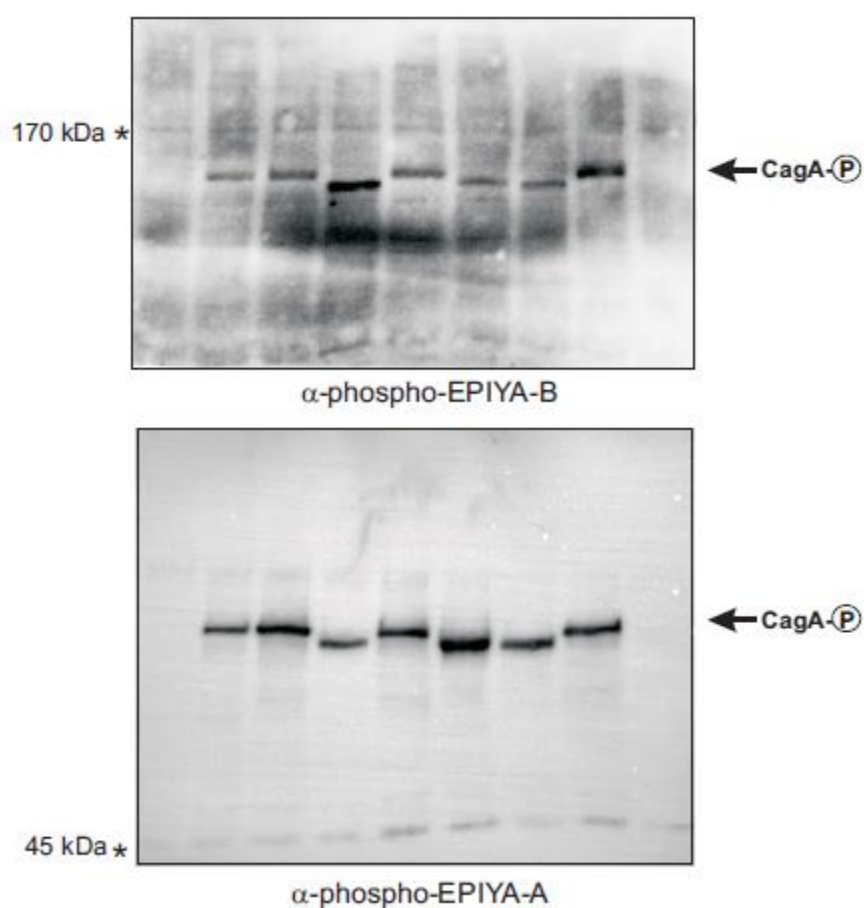

**Figure S1.** CagA EPIYA-motif phosphorylation during *H. pylori* infection of AGS cells was investigated using the indicated  $\alpha$ -phosphotyrosine antibodies. Full-size blots of Figure 5A are shown. The phospho-CagA bands are labelled with arrows. A set of tyrosine-phosphorylated host cell proteins also appeared, which are marked with asterisks and sizes given in kDa.

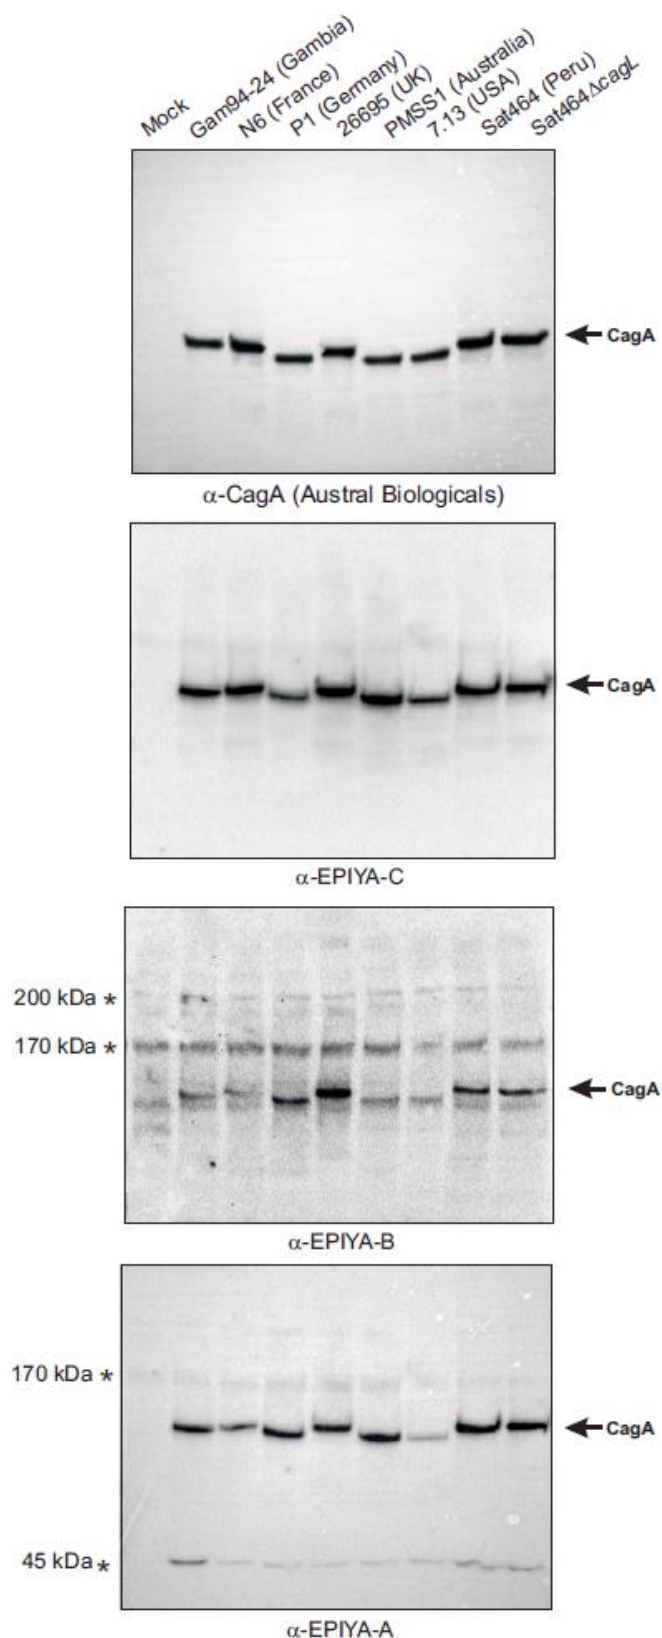

**Figure S2.** CagA expression during *H. pylori* infection of AGS cells was investigated using the indicated α-CagA and α-EPIYA antibodies. Full-size blots of Figure 5B are shown. The non-phospho-CagA bands are labelled with arrows. A set of cross-reacting host cell proteins are also seen, which are marked with asterisks and sizes in kDa.

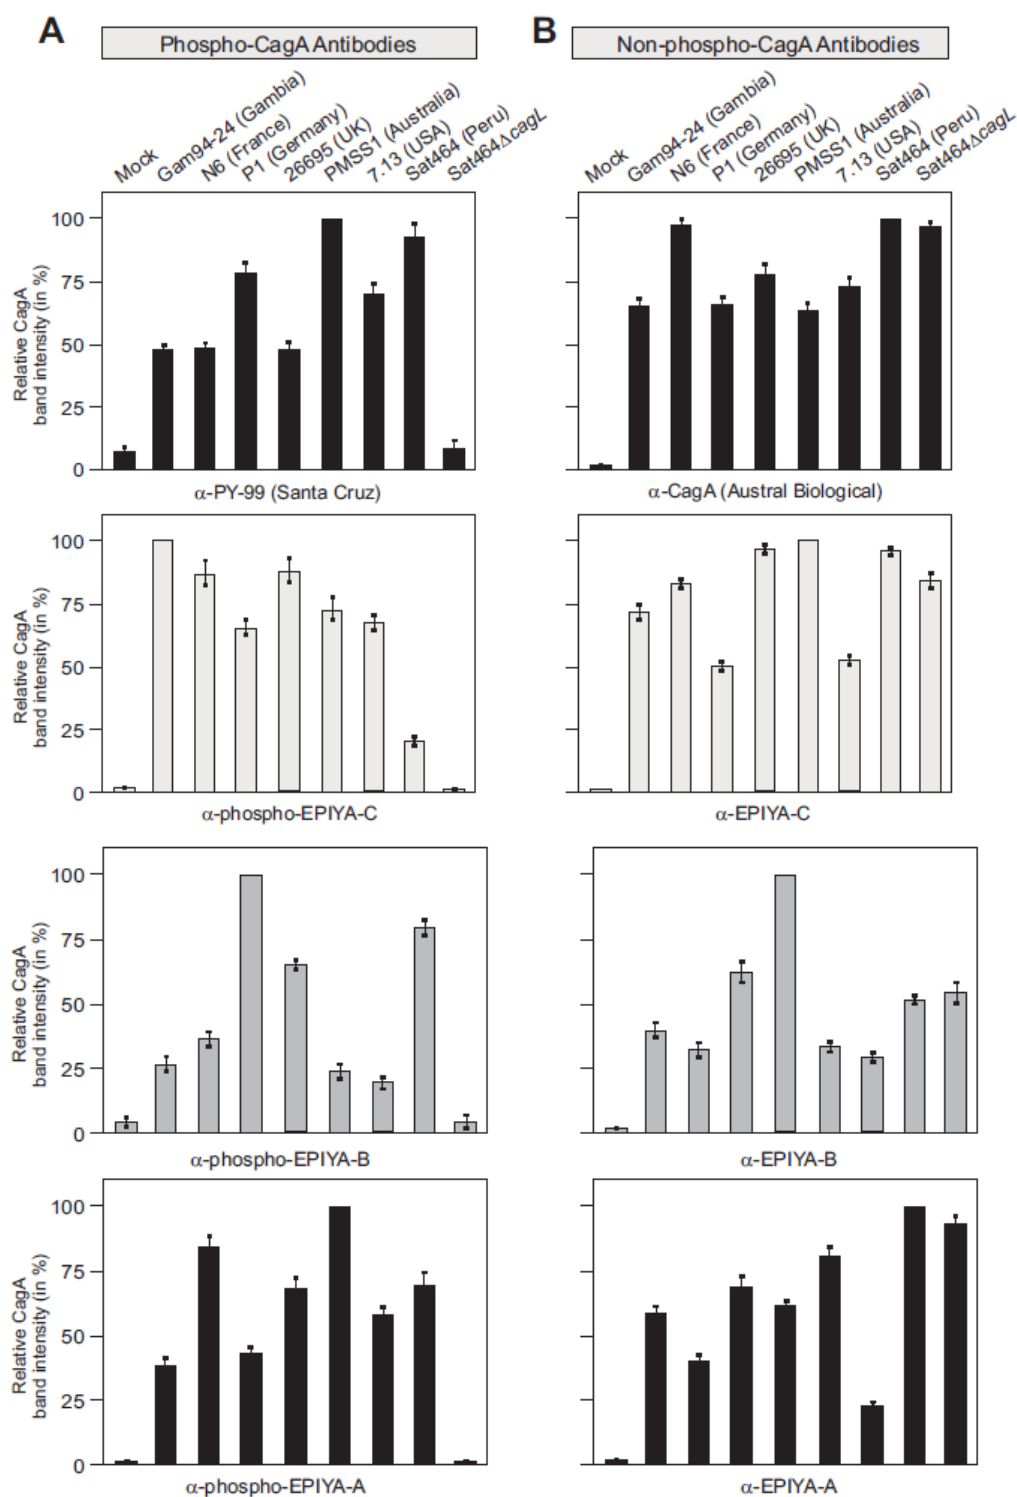

**Figure S3.** Statistics of CagA EPIYA-motif phosphorylation and expression of CagA during *H. pylori* infection of AGS cells. Band intensities of samples using the indicated specific  $\alpha$ -phosphotyrosine (A) and  $\alpha$ -CagA/EPIYA (B) antibodies shown in Figure 5 were measured by densitometry. The strongest band on each blot was set 100%. Three independent experiments were performed with similar results.

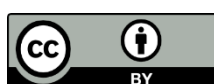

Supplement: s1 [file s1]
