# Supplementary material for: Tailor-Made Detection of Individual Phosphorylated and Non-Phosphorylated EPIYA-Motifs of Helicobacter pylori Oncoprotein CagA
Source: Cancers (Basel). 2019 Aug 13;11(8):1163. doi: 10.3390/cancers11081163 (PMC6721621; doi:10.3390/cancers11081163)
Supplement: Supplementary file 1 [file cancers-11-01163-s001.zip › Supplementary Table S1.xlsx]

## Sheet: CagA_Table_S1
	Strain	Country	Accession Code	CagA protein sequence
	Sat464	Peru	WP_001262532.1	MANDNQIKNPYLDQTPSQTAFDPQQFINNLQVAFIKVDSAVASFDPDQKPIVDKNDRDNRQAFNKISQLREEYANKAIKNPTKKNQYFSEFIGKSNDLINKDNLIDTDSSTKSFEKFGTERYQIFMNWVSHQKDPSKINTQKIRNFMENIIQPPISDDKEKAEFLRSAKQSFAGIIIGNQIRSDEKFMGVFEESLKERQEAEKKGELAGGDWFDIFLSFVFGKEQSSDLKETLNQEPRPSVEQNIATTPTDIQGLPPEARDLLDERGNFSKFTLGDMEMLDVEGVADIDPNYKFNQLLIHNNALSSMLMGSHSNIEPEKVSLLYGDNGGPEARHDWNATVGYKNQQGNNVATLINMHLKNGSGLVIAGNENGINNPSFYLYKKDQLTGLKQALSQEEIQ…
	Shi470	Peru	WP_001262964.1	MANETINQTKNPDQTPNQTAFDPQQFINNLQVAFIKVDSAVASFDPDQKPIVDKNDRDNRQAFNGISQLREEYANKAIKNPNKKNQYFSDFINKSNDLINKDNLIDTDSSTKSFQKFGPEPYQIFMNWVSHQKDPSKINTQKIRDFMENIIQPPISDDKEKAEFLRSAKQSFAGIIIGNQTRSDEKFMGVFEESLKEKQEAEKKGEPSGDWLDIFLSFVFNKKQSSDLKETLNQEPRPNVEQNIATTPTPIQGLPLEARDLLDERGDFSKFTLGDMEMLDVEGVADIDPNYKFNQLLIHNNALSSMLMGSHGNIDLEKVSLLYGDNGGPEARHDWNATVGYKNQQGNNVATLINAHLKNGSGLIIAGNENGINNPSFYLYKKDQLTGLEQALSQEEIQN…
	26695	UK	WP_000180747.1	MTNETIDQTRTPDQTQSQTAFDPQQFINNLQVAFIKVDNVVASFDPDQKPIVDKNDRDNRQAFDGISQLREEYSNKAIKNPTKKNQYFSDFIDKSNDLINKDNLIDVESSTKSFQKFGDQRYQIFTSWVSHQKDPSKINTRSIRNFMENIIQPPIPDDKEKAEFLKSAKQSFAGIIIGNQIRTDQKFMGVFDESLKERQEAEKNGGPTGGDWLDIFLSFIFNKKQSSDVKEAINQEPVPHVQPDIATTTTDIQGLPPEARDLLDERGNFSKFTLGDMEMLDVEGVADIDPNYKFNQLLIHNNALSSVLMGSHNGIEPEKVSLLYAGNGGFGDKHDWNATVGYKDQQGNNVATLINVHMKNGSGLVIAGGEKGINNPSFYLYKEDQLTGSQRALSQEEIR…
	ELS37	Salvador	WP_000180770.1	MTNETINQQPQTEAAFNPQQFINNLQVAFLKLDNAVASFDPDQKPIVDKNDRDNRQAFDGISQLREEYSNKAIKNPTKKNQYFSDFINKSNDLINKDNLIDVESSTKSFQKFGDQRYRIFTSWVSHQNDPSKINTRSIRNFMEHTIQPPISDDKEKAEFLKSAKQSFAGIIIGNQIRTDQKFMGVFDESLKERQEAEKNGEPTGGDWLDIFLSFIFDKKRSSDVKEAINQEPVPHVQPDIATTTTHIQGLPPESRDLLDERGNFSKFTLGDMEMLDVEGVADIDPNYKFNQLLIHNNALSSVLMGSHNGIEPEKVSLLYAGNGGFGAKHDWNATVGYKDQQGNNVATIINVHMKNGSGLVIAGGEKGINNPSFYLYKEDQLTGSQRALSQEEILNKVDF…
	Lit75	Lithuania	WP_000180787.1	MTNETINQQPQTEAAFNPQQFINNLQVAFLKVDNVVSSFDPDQKPIVDKNDRDNRQAFEKISQLMEEFANKAIKNPAKKNQYFSSFISKSNDLIDKGSLIDTGSSVKSFQKFGTQRYQIFMNWVSHQKDPSKINTQEIRGFMENIIQPPISDDKEKAEFLRSAKQAFAGIIIGNQIRSDQKFMGVFDESLKERQEAEKNGEPNGGDWFDIFLSFVFGKKQYSDLKETLNQEPMSNVEQNIATTTTDIQGLPPESRDLLDERGNFSKFTLGDMEMLDVEGVADIDPNYKFNQLVIHNNALSSVLMGSHNGIEPEKVSLLYGGNGGPEARHDWNATVGYKNQQGDNVATLINVHMKNGSGLVIAGGEKGVNNPSFYLYKEDQLTGSQRALSQKEIQNKVDF…
	SNT49	India	WP_000180759.1	MTNETIDQTTTPDQTPNQTAFNPQQFINNLQVAFLKVDNAVASYDPDQKPIVDKNDRDNRQAFDGISQLREEYSNKAIKNPTKKNQYFSDFINKSNDLINKDALIDVESSTKSFQKFGDQRYRIFTSWVSHQNDPSKINTRSIRNFMENIIQPPISDDKEKAEFLKSAKQSFAGIIIGNQIRTDQKFMGVFDESLKERQEAEKNGEPTGGDWLDIFLSFIFDKKQSSDVKEAINQEPVPHVQPDIATTTTHIQGLPPESRDLLDERGNFSKFTLGDMEMLDVEGVADIDPNYKFNQLLIHNNALSSVLMGSHNGIEPEKVSLLYAGNGGFGAKHDWNATVGYKDQQGNNVATIINVHMKNGSGLVIAGGEKGINNPSFYLYKEDQLTGSQRALSQEEIR…
	908A	Africa	WP_000180724.1	MTNETIDQQPQTEAAFNPQQFINNLQVAFLKVDNAIASFDPDQKPIVDKNDRDNRQAFDGISQLREEYSNKAIKNPTKKNQYFSDFINKSSDLINKDNLIDVESSTKSFQKFGDQRYRIFTSWVSHQNDPSKINTRSIRNFMEHAIQPPIPDDKEKAEFLKSAKQSFAGIIIGNQIRTDQKFMGVFDESLKERQEAEKNGGSTGGDWLDIFLSFIFDKKQSSDVKEAINQEPVPHVQPDIATSTTHIQGLPPESRDLLDERGNFSKFTLGDMEMLDVEGVADMDPNYKFNQLLIHNNALSSVLMGSHDGIEPEKVSLLYAGNGGFGDKHDWNATVGYKDQQGNNVATIINVHMKNGSGLIIAGGEKGINNPSFYLYKEDQLTGSQRALSQEEIQNKIDF…
	2017	Africa	WP_000180723.1	MTNETIDQQPQTEAAFNPQQFINNLQVAFLKVDNAIASFDPDQKPIVDKNDRDNRQAFDGISQLREEYSNKAIKNPTKKNQYFSDFINKSNDLINKDNLIDVESSTKSFQKFGDQRYRIFTSWVSHQNDPSKINTRSIRNFMEHAIQPPIPDDKEKAEFLKSAKQSFAGIIIGNQIRTDQKFMGVFDESLKERQEAEKNGGSTGGDWLDIFLSFIFDKKQSSDVKEAINQEPVPHVQPDIATSTTHIQGLPPESRDLLDERGNFSKFTLGDMEMLDVEGVADMDPNYKFNQLLIHNNALSSVLMGSHDGIEPEKVSLLYAGNGGFGDKHDWNATVGYKDQQGNNVATIINVHMKNGSGLIIAGGEKGINNPSFYLYKEDQLTGSQRALSQEEIQNKIDF…
	2018	Africa	WP_000180723.1	MTNETIDQQPQTEAAFNPQQFINNLQVAFLKVDNAIASFDPDQKPIVDKNDRDNRQAFDGISQLREEYSNKAIKNPTKKNQYFSDFINKSNDLINKDNLIDVESSTKSFQKFGDQRYRIFTSWVSHQNDPSKINTRSIRNFMEHAIQPPIPDDKEKAEFLKSAKQSFAGIIIGNQIRTDQKFMGVFDESLKERQEAEKNGGSTGGDWLDIFLSFIFDKKQSSDVKEAINQEPVPHVQPDIATSTTHIQGLPPESRDLLDERGNFSKFTLGDMEMLDVEGVADMDPNYKFNQLLIHNNALSSVLMGSHDGIEPEKVSLLYAGNGGFGDKHDWNATVGYKDQQGNNVATIINVHMKNGSGLIIAGGEKGINNPSFYLYKEDQLTGSQRALSQEEIQNKIDF…
	Gam9424	Africa	WP_000180703.1	MTNETIDQQPQTEAAFNPQQFINNLQVAFLKIDNAVASYDPDQKPIVDKNDRDNRQAFEGISQLREEYSNKAIKNPTKKNQYFSDFINKSNDLINKDNLIDVESSTESFRKFGDQRYRIFTSWVSHQNDPSKINTRSIRNFMERTIQPPIPDDKEKAEFLKSAKQSFAGIIIGNQIRTDQKFMGVFDESLKERQEAEKNGGPTGGDWLDIFLSFIFDKKQSSDVKEAINQEPVPNVQPDIATTTIHIQGLPPESRDLLDERGNFSKFTLGDMEMLDVEGVADIDPNYKFNQLLIHNNALSSVLMGSHNGIEPEKVSLLYAGNGGFGDKHDWNATVGYKDQQGNNVATMINVHMKNGSGLVIAGGEKGINNPSFYLYKEDQRTGSQRALSQEEILNKIDF…
	P1	Germany	WP_000180747.1	MTNETIDQTRTPDQTQSQTAFDPQQFINNLQVAFIKVDNVVASFDPDQKPIVDKNDRDNRQAFDGISQLREEYSNKAIKNPTKKNQYFSDFIDKSNDLINKDNLIDVESSTKSFQKFGDQRYQIFTSWVSHQKDPSKINTRSIRNFMENIIQPPIPDDKEKAEFLKSAKQSFAGIIIGNQIRTDQKFMGVFDESLKERQEAEKNGGPTGGDWLDIFLSFIFNKKQSSDVKEAINQEPVPHVQPDIATTTTDIQGLPPEARDLLDERGNFSKFTLGDMEMLDVEGVADIDPNYKFNQLLIHNNALSSVLMGSHNGIEPEKVSLLYAGNGGFGDKHDWNATVGYKDQQGNNVATLINVHMKNGSGLVIAGGEKGINNPSFYLYKEDQLTGSQRALSQEEIR…
	PMSS1	Australia	WP_077232098.1	MTNETINQQPQTEAAFNPQQFINNLQVAFLKVDNAVASYDPDQKPIIDKNDRDNRQAFEGISQLREEYSNKAIKNPTKKNQYFSDFINKSNDLINKDDLIDVESSTKSFQKFGDQRYRIFTSWVSHQNDPSKINTRSIRNFMENIIQPPIPDDKEKAEFLKSAKQSFAGIIIGNQIRTDQKFMGVFDESLKERQEAEKNGGPTGGDWLDIFLSFIFDKKQSSDVKEAINQEPVPHVQPDIATTTTHIQGLPPESRDLLDERGNFSKFTLGDMEMLDVEGVADIDPNYKFNQLLIHNNALSSVLMGSHNGIEPEKVSLLYAGNGGFGAKHDWNATVGYKDQQGNNVATIINVHMKNGSGLVIAGGEKGINNPSFYLYKEDQLTGSQRALSQEEIRNKIDF…
	7.13	USA	WP_000180765.1	MTNETINQQPQTEAAFNPQQFINNLQVAFIKVDNAVASFDPDQKPIVDKNDRDNRQAFEKISQLREKFANKAIKNPTKKNQYFSNFISKSSDLINKDGLIDTGSSIKSFQKFGTQRYQIFMNWVSHQKDPSQINTQKIRGFMENIIQPPISDDKEKAEFLRSAKQALAGIIIRNQIRSDQKFMGVFDESLKERQEAEKNGEPNGDPTGGDWFDIFLSFVFNKKQSSDLKETLNQEPVPHVQPDVATTTTDIQSLPPESRDLLDERGNFSKFTLGDMEMLDVEGVADIDPNYKFNQLLVHNNALSSVLMGSHDGIEPEKVSLLYGNNGGPEARHDWNATVGHKNQQGNNVATLINVHMKNGSGLVIAGGEKGVNNPSFYLYKEDQLTGLKQALSQKEIQN…
	HP2RS	Germany	WP_000180747.1	MTNETIDQTRTPDQTQSQTAFDPQQFINNLQVAFIKVDNVVASFDPDQKPIVDKNDRDNRQAFDGISQLREEYSNKAIKNPTKKNQYFSDFIDKSNDLINKDNLIDVESSTKSFQKFGDQRYQIFTSWVSHQKDPSKINTRSIRNFMENIIQPPIPDDKEKAEFLKSAKQSFAGIIIGNQIRTDQKFMGVFDESLKERQEAEKNGGPTGGDWLDIFLSFIFNKKQSSDVKEAINQEPVPHVQPDIATTTTDIQGLPPEARDLLDERGNFSKFTLGDMEMLDVEGVADIDPNYKFNQLLIHNNALSSVLMGSHNGIEPEKVSLLYAGNGGFGDKHDWNATVGYKDQQGNNVATLINVHMKNGSGLVIAGGEKGINNPSFYLYKEDQLTGSQRALSQEEIR…
	BAC555-8	Germany	WP_000180747.1	MTNETIDQTRTPDQTQSQTAFDPQQFINNLQVAFIKVDNVVASFDPDQKPIVDKNDRDNRQAFDGISQLREEYSNKAIKNPTKKNQYFSDFIDKSNDLINKDNLIDVESSTKSFQKFGDQRYQIFTSWVSHQKDPSKINTRSIRNFMENIIQPPIPDDKEKAEFLKSAKQSFAGIIIGNQIRTDQKFMGVFDESLKERQEAEKNGGPTGGDWLDIFLSFIFNKKQSSDVKEAINQEPVPHVQPDIATTTTDIQGLPPEARDLLDERGNFSKFTLGDMEMLDVEGVADIDPNYKFNQLLIHNNALSSVLMGSHNGIEPEKVSLLYAGNGGFGDKHDWNATVGYKDQQGNNVATLINVHMKNGSGLVIAGGEKGINNPSFYLYKEDQLTGSQRALSQEEIR…
	Ca173	Germany	AAY18598.1	MTNETIDQQPQTEAAFNPQQFINNLQVAFLKVDNAVASYDPDQKPIIDKNDRDNRQAFDGISQLREEYSNKAIKNPTKKNQYFSDFINKSNDLINKDALIDVESSTKSFQKFGDQRYRIFTSWVSHQNDPSKINTRSIRNFMENIIQPPIHDDKEKAEFLKSAKQSFAGIIIGNQIRTDQKFMGVFDESLKERQEAEKNGGPTGGDWLDIFLSFIFNKKQSSDVKEAINQEPVPHVQPDIATTTTHIQGLPPESRDLLDERGNFSKFTLGDMEMLDVEGVADIDPNYKFNQLLIHNNALSSVLMGSHNGIEPEKVSLLYAGNGGFGAKHDWNAPVGYKDQQGNNVATIINVHMKNGSGLVIAGGEKGINNPSFYLYKEDQLTGSQRALSQEEIRNKIDF…
	84_183	Japan	P55746.1	MTNETIDQQPQTEAAFNPQQFINNLQVAFLKVDNAVASYDPDQKPIVDKNDRDNRQAFEGISQLREEYSNKAIKNPTKKNQYFSDFINKSNDLINKDNLIVVESSTKSFQKFGDQRYRIFTSWVSHQNDPSKINTRCIRNFMEHTIQPPIPDDKEKAEFLKSAKQSFAGIIIGNQIRTDQKFMGVFDESLKERQEAEKNGGPTGGDWLDIFLSFIFDKKQSSDVKEAINQEPLPHVQPDIATSTTHIQGLPPESRDLLDERGNFSKFTLGDMEMLDVEGVADMDPNYKFNQLLIHNNTLSSVLMGSHDGIEPEKVSLLYAGNGGFGAKHDWNATVGYKDQQGNNVATIINVHMKNGSGLVIAGGEKGINNPSFYLYKEDQLTGSQRALSQEEIQNKIDF…
	B128	USA	WP_000180765.1	MTNETINQQPQTEAAFNPQQFINNLQVAFIKVDNAVASFDPDQKPIVDKNDRDNRQAFEKISQLREKFANKAIKNPTKKNQYFSNFISKSSDLINKDGLIDTGSSIKSFQKFGTQRYQIFMNWVSHQKDPSQINTQKIRGFMENIIQPPISDDKEKAEFLRSAKQALAGIIIRNQIRSDQKFMGVFDESLKERQEAEKNGEPNGDPTGGDWFDIFLSFVFNKKQSSDLKETLNQEPVPHVQPDVATTTTDIQSLPPESRDLLDERGNFSKFTLGDMEMLDVEGVADIDPNYKFNQLLVHNNALSSVLMGSHDGIEPEKVSLLYGNNGGPEARHDWNATVGHKNQQGNNVATLINVHMKNGSGLVIAGGEKGVNNPSFYLYKEDQLTGLKQALSQKEIQN…
	SJM180	Peru	WP_000180709.1	MTNETIDQQPQTEAAFNPQQFINNLQVAFLKLDNAVASFDPDQKPIVDKNDRDNRQAFDGISQLREEYSNKAIKNPTKKNQYFSDFINKSNDLINKDALIDVESSTKSFQKFGDQRYRIFTSWVSHQNDPSKINTRSIRNFMEHTIQPPIPDDKEKAEFLKSAKQSFAGIIIGNQIRTDQKFMGVFDESLKERQEAEKNGGPSGGDWLDIFLSFIFDKKQSSDVKEAINQEPVPHVQPDIATTTTDIQGLPPESRDLLDERGNFSKFTLGDMNMLDVEGVADIDPNYKFNQLLIHNNALSSVLMGSHNGIEPEKVSLLYAGNGGFGAKHDWNATVGYKDQQGNNVATIINVHMKNGSGLVIAGGEKGINNPSFYLYKEDQLTGSQRALSQEEIRNKIDF…
	J166	USA	WP_026938812.1	MTNETINQQPQTEAAFNPQQFINNLQVAFIKVDNAVASFDPDQKPIVDKNDRDNRQAFEKISQLREEFANKAIKNPTKKNQYFSNFISKSSDLINKDGLIDTGSSIKSFQKFGTQCYQIFMNWVSHQKDPSQINTQKIRGFMENIIQPPISDDKEKAEFLRSAKQAFAGIIIGNQIRSDQKFMGVFDESLKERQEAEKNGEPNGDPTGGDWLDIFLSFVFNKKQSSDLKETLNQEPVPHVQPDVATTTTDIQSLPPESRDLLDERGNFSKFTLGDMEMLDVEGVADIDPNYKFNQLLIHNNALSSVLMGSHDGIEPEKVSLLYGNNGGPEARHDWNATVGHKNQQGNNVATLINVHMKNGSGLVIAGGEKGVNNPSFYLYKEDQLTGLKQALSQKEIQN…
	N6	France	WP_000180747.1	MTNETIDQTRTPDQTQSQTAFDPQQFINNLQVAFIKVDNVVASFDPDQKPIVDKNDRDNRQAFDGISQLREEYSNKAIKNPTKKNQYFSDFIDKSNDLINKDNLIDVESSTKSFQKFGDQRYQIFTSWVSHQKDPSKINTRSIRNFMENIIQPPIPDDKEKAEFLKSAKQSFAGIIIGNQIRTDQKFMGVFDESLKERQEAEKNGGPTGGDWLDIFLSFIFNKKQSSDVKEAINQEPVPHVQPDIATTTTDIQGLPPEARDLLDERGNFSKFTLGDMEMLDVEGVADIDPNYKFNQLLIHNNALSSVLMGSHNGIEPEKVSLLYAGNGGFGDKHDWNATVGYKDQQGNNVATLINVHMKNGSGLVIAGGEKGINNPSFYLYKEDQLTGSQRALSQEEIR…
	3046	Colombia	WP_097683675.1	MTNETIDQQPQTEAAFNPQQFINNLQVAFLKLDNAVASFDPDQKPIVDKNDKDNRQAFDGISQLREEYSNKAIKNPTKKNQYFSDFINKSNDLINKDNLIDVESSTKSFQKFGDQRYRIFTSWVSHQNDPSKINTRSIRNFMENIIQPPIPDDKEKAEFLKSAKQSFAGIIIGNQIRTDQKFMGVFDESLKERQEAEKNGGPTGGDWLDIFLSFVFNKKQSSDVKEAINQEPVPHVQPDIATTTTDIQGLPPESRDLLDERGNFSKFTLGDMEMLDVEGVADIDPNYKFNQLLIHNNALSSVLMGSHNGIEPEKVSLLYAGNGGFGDKHDWNATVGYKDQQGDNVATIINVHMKNGSGLVIAGGEKGINNPSFYLYKEDQLTGSQRALSQEEIRNKIDF…
	3026	Colombia	WP_097715671.1	MTNETIDQQPQTEVAFNPQQFINNLQVAFLKLDNAVASFDPDQKPIVDKNDRDNRQAFDGISQLREEYSNKAIKNPTKKNQYFSDFINKSNDLINKDNLIDVESSTKSFQKFGDQRYRIFTSWVSHQNDPSKINTRSIRNFMENIIQPPISDDKEKAEFLKSAKQSFAGIIIGNQIRTDQKFMGVFDESLKERQEAEKNGGPTGGDWLDIFLSFIFDKKQSSDVKEAINQEPVPHVQPDIATTTTDIQGLPPESRDLLDERGNFSKFTLGDMEMLDVEGVADMDPNYKFNQLLIHNNALSSVLMGSHNGIEPEKVSLLYAGNGGFGAKHDWNATVGYKDQQGNNVATIINVHMKNGSGLVIAGGEKGINNPSFYLYKEDQLTGSQRALSQEEIRNKIDF…
	HP14036	Australia	WP_120899350.1	MTNETIDQTRTPDQTQSQTAFDPQRFINNLQVAFLKVDNAVASFDPDQKPIVDKNDRDNRQAFDGISQLREEYSNKAIKNPTKKNQYFSDFINKSSDLINKDNLIDVESSTKSFQKFGDQRYRIFTSWVSHQNDPSKINTRSIRNFMENIIQPPIPDDKEKAEFLKSAKQSFAGIIIGNQIRTDQKFMGVFDESLKERQEAEKNGEPTGGDWLDIFLSFIFDKKQSSDVKETLNQEPVPHVQPDIATTTTDIQGLPPEARDLLDERGNFSKFTLGDMEMLDVEGVADIDPNYKFNQLLIHNNALSSVLMGSHNGIEPEKVSLLYAGNGGFGDKHDWNATVGYKDQQGNNVATIINVHMKNGSGLVIAGGEKGINNPSFYLYKEDQLTGSQRALSQEEIQ…
	HP13064	Australia	WP_120915043.1	MTNETINQQPQTEAAFNPQQFINNLQVAFLKVDNAVASYDPDQKPIVDKNDRDNRQAFDGISQLREEYSNKAIKNPTKKNQYFSDFIDKSNDLINKDNLIDVESSTKSFQKFGDQRYRIFTSWVSHQNDPSKINTRSIRNFMENIIQPPIPDDKEKAEFLKSAKQSFAGIIIGNQIRTDQKFMGVFDESLKERQEAEKNGGPTGGDWLDIFLSFIFDKKQSSDVKEAINQEPVPHVQPDIATTTTDIQGLPPESRDLLDERGNFSKFTLGDMEMLDVEGVADIDPNYKFNQLLIHNNALSSVLMGSHNGIEPEKVSLLYAGNGGFGAKHDWNATVGYKDQQGNNVATIINVHMKNGSGLVIAGGEKGINNPSFYLYKEDQLTGSQRALSQEEIRNKIDF…
